# Supplementary material
Source: publisher figshare collection journal article supplement (https://tandf.figshare.com/articles/dataset/_/9206132)
Supplement: Supplementary file 2 [file 1]

Supplementary Table S4a. Research team and reflexivity based on item 1-6 of the COREQ checklist (Consolidated criteria for Reporting Qualitative research). The complete checklist can be found in the Supplementary Table S4b

| COREQ item# | Personal Characteristics                  |                  |                                                                                                                                                                                                  |
|-------------|-------------------------------------------|------------------|--------------------------------------------------------------------------------------------------------------------------------------------------------------------------------------------------|
| 1           | Interviewer/facilitator                   |                  | XX, YY conducted the interviews                                                                                                                                                                  |
| 2           | Credentials                               | Interviewer      | BS, PhD                                                                                                                                                                                          |
|             |                                           | Co-Investigators | PhD, PhD, MD, MD & PhD                                                                                                                                                                           |
| 3           | Occupations                               | Interviewer      | Research Associate & Rehab-Case Manager, Research Scientist & Rehabilitation Specialist                                                                                                          |
|             |                                           | Co-Investigators | Research Scientist & Psychologist, Occupational Physician & Researcher, Researcher & Psychologist, Rehabilitation Physician & Researcher                                                         |
| 4           | Gender                                    | Interviewer      | Female, male                                                                                                                                                                                     |
|             |                                           | Co-Investigators | Female, male, female, male                                                                                                                                                                       |
| 5           | Experience and training                   | Interviewer      | Both interviewers had experience in qualitative and mixed methods research which was published in peer-reviewed journals                                                                         |
|             |                                           | Co-Investigators | All had previously been involved in qualitative research which was published in peer-reviewed journals                                                                                           |
|             |                                           |                  | Relationship with participants                                                                                                                                                                   |
| 6           | Relationship established                  | Interviewer      | Relationship was established on site prior to study commencement. Several visits, calls and email correspondence had taken place before each individual interview.                               |
|             |                                           | Co-Investigators | Two out of six researchers were familiar with representatives of the participating companies. These two researchers were NOT the interviewers.                                                   |
| 7           | Participants knowledge of the interviewer |                  | The interviewers did present the research project to each participant individually, introduced themselves in terms of goals and interests, and disclosed their role within the research project. |
| 8           | Interviewer characteristics               |                  | No bias assumptions were reported. The major reason of interest was the lack of evidence on the perceptions of CMs about recovery after minor MVC injuries.                                      |

|  |  |  |  |
|--|--|--|--|
|  |  |  |  |
|--|--|--|--|
