# Supplementary material
Source: publisher figshare collection journal article supplement (https://tandf.figshare.com/articles/dataset/_/9206132)
Supplement: Supplementary file 3 [file 2]

Archive with 3 entries (3 files):
- idre_a_1630857_sm2988.pdf
- idre_a_1630857_sm2987.pdf
- idre_a_1630857_sm2986.docx
