# Supplementary material
Source: publisher figshare collection journal article supplement (https://tandf.figshare.com/articles/dataset/_/9206132)
Supplement: Supplementary file 3 [file 2 › idre_a_1630857_sm2986.docx]

Supplementary materials

Supplementary table S1. Context of the study

| New South Wales (Australia)  In the state of New South Wales Australia (population approximately 7 million people), there is a motor vehicle injury compensation scheme that is largely “fault” based which means it is a tort system in which compensation is sought for injuries sustained when the injured person is determined not to be at fault in causing the crash. There are five insurance companies operating in the state and case managers from one of these companies were interviewed. The insurance companies are obliged to follow “claims handling guidelines”(<http://www.sira.nsw.gov.au/resources-library/motor-accident-resources/publications/for-professionals/guides-for/claims-handling-guidelines> Accessed 1 April 2017) that are developed and monitored by government insurance regulator.  United States of America  The United States has a complex and fragmented network of legal arrangements for the provision of financial support and health rehabilitation services for those affected by MV-MSD. The legal environment can be classified into three principal systems: tort liability, add-on and no-fault (IRC 2012). Although, they all share a common goal of facilitating recovery and minimize losses, there is a diversity of legislation, practices and policies across the states. This diversity is reflected by the thresholds of coverage (“limits”), out-of-pocket expenses, such as medical costs, lost wages, costs for liability settlements and payments for general damages and compensation for pain and suffering. Ten insurance companies operating in the U.S. cover more than 60% of the market share. Case managers from one of these companies were interviewed. In many no-fault states the medical expenses must exceed a specific threshold (either monetary e.g. 2,000$ in Massachusetts or criteria of severity of injury) before a claim for extra damages (pain and suffering) may be filed. The case manager were managing with claims from no fault states e.g. New York state, Michigan or Massachusetts. However, while no-fault was introduced to reduce litigation, in many “non-fault” state claims may be legally represented up to 70% of all claims, literally creating a “fault environment” for managing claims. No evidence based claim handling guideline is mandated by the regulator. |
| --- |

Supplementary table S2. Main interview question and socio-demographic items

| Questions were centered on factors believed to be good or bad for recovery, especially what was most important early on in the claims process. The typical question was:  *What are the things that give you an indication, early on, that a person will recover well or that recovery will be delayed?*  Socio-demographic information:  Year of birth, Current job position, Specialty, Number of hours worked per week, Total number of years worked as a claim manager, Total number of years worked as a claim manager for current insurer, Any previous profession, Educational level. |
| --- |

Supplementary table S3. Individual participant characteristics (N=40).

| ID# ǂ | Age | Gender | Years of Experience | Health Care Background | Highest Educational Qualification |
| --- | --- | --- | --- | --- | --- |
| US1 | 46 | Female | 22 | No | Bachelor |
| US2 | 37 | Female | 15 | No | Post graduate |
| US3 | 36 | Male | 9 | No | Bachelor |
| US4 | 41 | Female | 14 | No | Bachelor |
| US5 | 61 | Female | 11 | No | Bachelor |
| US6 | 53 | Female | 7 | No | Certificate |
| US7 | 31 | Female | 4 | No | Post graduate |
| US8 | 43 | Female | 17 | No | Certificate |
| US9 | 55 | Female | 22 | No | Certificate |
| US10 | 48 | Female | 6 | Yes | Bachelor |
| US11 | 58 | Male | 13 | No | Certificate |
| US12 | 47 | Male | 21 | No | Post graduate |
| US13 | 50 | Female | 15 | No | Certificate |
| US14 | 46 | Female | 15 | No | Certificate |
| US15 | 42 | Female | 14 | No | Post graduate |
| US16 | 46 | Female | 12 | No | Certificate |
| US17 | 56 | Female | 7 | No | Bachelor |
| US18 | 51 | Female | 27 | No | Certificate |
| US19 | 45 | Female | 18 | No | Bachelor |
| US20 | 64 | Female | 21 | No | Bachelor |
| AUS1 | 37 | Female | 7 | No | Post graduate |
| AUS2 | 25 | Male | 3 | No | Bachelor |
| AUS3 | 44 | Female | 10 | No | Bachelor |
| AUS4 | 57 | Female | 12 | Yes | Post graduate |
| AUS5 | 32 | Female | 5 | No | Bachelor |
| AUS6 | 42 | Male | 7 | No | Bachelor |
| AUS7 | 27 | Female | 3 | Yes | Bachelor |
| AUS9 | 28 | Female | 4 | Yes | Bachelor |
| AUS10 | 29 | Female | 4 | No | Bachelor |
| AUS11 | 27 | Female | 3 | No | Bachelor |
| AUS12 | 64 | Male | 26 | Yes | Post graduate |
| AUS13 | 23 | Female | 2 | No | Bachelor |
| AUS14 | 38 | Female | 14 | No | Post graduate |
| AUS15 | 30 | Female | 2 | Yes | Bachelor |
| AUS16 | 40 | Female | 7 | No | Post graduate |
| AUS17 | 32 | Female | 6 | No | Bachelor |
| AUS18 | 45 | Female | 8 | Yes | Bachelor |
| AUS19 | 39 | Female | 11 | Yes | Bachelor |
| AUS20 | 33 | Female | 7 | Yes | Post graduate |
| AUS21 | 65 | Male | 13 | Yes | Bachelor |

ǂ Identification numbers (ID#) indicate the country from which the participant came from and his or her order of interview (e.g. US1 = origin US, first US participant interviewed). Note: AUS8 was not included in the data analysis due to technical problems (no recording and no transcript was available).
